# Supplementary material
Source: bioRxiv or medRxiv preprint supplement (https://www.medrxiv.org/highwire/filestream/95139/field_highwire_adjunct_files/0/2020.08.30.20184309-1.pdf)
Supplement: Supplementary file [file 2020.08.30.20184309-1.pdf]

## Materials and methods supplement

### Materials

| <i>Equipment</i>                            | <i>Brand</i>      | <i>Model/ Cat n°</i> |
|---------------------------------------------|-------------------|----------------------|
| Plate washer                                | Thermo Scientific | Wellwash 1x8         |
|                                             | Molecular Devices | Aquamax 2000         |
| Plate reader                                | Tecan             | Infinite M200        |
| Manual multichannel pipette (50-250 µL)     | VWR               | 613-5257P            |
| Electronic multichannel pipette (10-300 µL) | VWR               | 613-5418             |
| Electronic single channel pipettes          | VWR               | 613-5425             |
| Pipette controller- Pipetboy                | VWR               | 612-0928             |
| Reagent reservoir (5bags with 40)           | VWR               | 613-1183P            |
| Sealing Tape for 96-Well Plates             | Thermo Scientific | 15036                |

| <i>Material: ELISA Plates (Surface Treatment)</i> | <i>Properties</i>                                                                               | <i>Brand</i>      | <i>Cat n#</i> |
|---------------------------------------------------|-------------------------------------------------------------------------------------------------|-------------------|---------------|
| Immulon 4 HBX                                     | Very Good with Immunoglycoproteins, proteins (water soluble), and good with Gycans. Hydrophobic | Thermo Scientific | 3855          |
| MaxiSorp                                          | Very Good with Immunoglycoproteins, proteins (water soluble), and good with Gycans. Hydrophobic | Merck             | M9410-1CS     |

| <i>Reagents: Buffers and antibodies</i>               | <i>Reagent</i>                     | <i>Brand</i>      | <i>Cat n#</i> |
|-------------------------------------------------------|------------------------------------|-------------------|---------------|
| Virus inactivation                                    | Triton X-100                       | Sigma             | T8787-100ml   |
| Coating Buffer                                        | PBS 1x (liquid)                    | Thermo Scientific | A1286301      |
| Blocking buffer                                       | PBS-T + 3% dry milk powder* (w/v)  | *Frilabo          | sc-2324       |
| Dilution buffer                                       | PBS 1x                             |                   |               |
| Wash Buffer                                           | PBS 1x + 0.1% (v/v) Tween-20       |                   |               |
| Detergent                                             | Tween-20                           | Sigma             | P1379         |
| Positive serum                                        | # from confirmed cases of COVID-19 |                   |               |
| Negative serum                                        | #from IMM Biobank (frozen samples) |                   |               |
| Pool of positive serum samples - Quality control (QC) | # from confirmed cases of COVID-19 |                   |               |
| Secondary antibody (enzyme-conjugate)- HPR            | Goat Anti-Human IgG+IgM+IgA (HRP)  | ab102420          | Abcam         |
|                                                       |                                    |                   | Abcam         |

|               |                                                 |            |           |
|---------------|-------------------------------------------------|------------|-----------|
|               | Goat Anti-Human IgG Fc (HRP)                    | ab97225    |           |
|               | Goat Anti-Human IgM mu chain (HRP)              | ab97205    | Abcam     |
|               | Goat Anti-Human IgA alpha chain (HRP)           | ab97215    | Abcam     |
| Substrate     | TMB Substrate Reagent Set                       | BD OptEIA™ | 555214    |
| Stop solution | Sulfuric Acid (H <sub>2</sub> SO <sub>4</sub> ) | VWR        | 85973.290 |

### Plate preparation

- Recombinant RBD protein
- Recombinant full-length spike protein
- Flat-Bottom Immuno Nonsterile 96-Well Plates 4 HBX (Thermo Scientific #3855)
- Flat Bottom Cell Culture Plates (Corning #3599)
- Triton X-100 (Sigma # T8787-100ml)
- Milk Powder (Frlabo # sc-2324)
- PBS (1x) (Thermo Scientific Gibco # sc-2324)
- Tween 20 (Sigma #P1379)
- TMB Substrate Reagent Set (BD OptEIA™ #555214)
- Sulfuric Acid (H<sub>2</sub>SO<sub>4</sub>) (Sigma #339741)

### Secondary antibody (enzyme-conjugate)- HPR

- Goat Anti-Human IgG+IgM+IgA (HRP) (Abcam #ab102420)
- Goat Anti-Human IgG Fc (HRP) (Abcam #ab97225)
- Goat Anti-Human IgM mu chain (HRP) (Abcam #ab97205)
- Goat Anti-Human IgA alpha chain (HRP) (Abcam #ab97215)

### Sterile, serological pipettes

- 5ml (Falcon #356543 or equivalent)
- 10ml (Falcon #357551 or equivalent)
- 25 ml (Falcon #357535 or equivalent)

### Micropipette tips

- 10 µl barrier tips (Denville Scientific #P1121 or equivalent)
- 20 µl barrier tips (Denville Scientific #P1121 or equivalent)
- 200 µl barrier tips (Denville Scientific #P1122 or equivalent)
- 200 µl tips (USA Scientific #1111-1700 or equivalent)
- 1000 µl barrier tips (Denville Scientific #P1126 or equivalent)

Sterile reservoirs (Fisher Scientific #07-200-127 or equivalent)

Micropipettes

Class II biological safety cabinet

Ultra-Low Freezer (-80°C)

Refrigerator at 4°C (+/- 1°C)

Multichannel pipette(s) capable of pipetting 50-250 µl

1.5 ml Eppendorf tubes (Denville #C2170 or equivalent)

Timer

Aquamax 2000 Plate Washer (Molecular Devices #AQUAMAX 2000 or equivalent)  
Tecan Infinite M200 microplate Reader or equivalent.
